# Supplementary material for: Research Models to Study Ferroptosis’s Impact in Neurodegenerative Diseases
Source: MDPI journal article supplement (doi:10.3390/pharmaceutics15051369), 2023-04-29
Supplement: s1 [file s1]

# Supplementary Materials: Research models to study ferroptosis's impact in neurodegenerative diseases

Inês Costa, Daniel José Barbosa, Vera Silva, Sofia Benfeito, Fernanda Borges, Fernando Remião and Renata Silva

**Table S1.** Advantages and disadvantages of different *in vitro* models used in the study of neurodegenerative diseases.

| Model                           | Advantages                                                                                                                                                                                                                                                                                        | Disadvantages                                                                                                                                                                         |
|---------------------------------|---------------------------------------------------------------------------------------------------------------------------------------------------------------------------------------------------------------------------------------------------------------------------------------------------|---------------------------------------------------------------------------------------------------------------------------------------------------------------------------------------|
| <i>SH-SY5Y cells</i>            | Human origin.<br>Capability of being differentiated into distinct neuronal phenotypes (cholinergic, dopaminergic or noradrenergic) [185].<br>Easy to maintain in culture.<br>Suitable for high throughput screenings [94].                                                                        | Genomic instability; metabolism and terminal differentiation influenced by its neuroblastoma origin [92].<br>Cellular outcome might depend on the differentiation protocol [94].      |
| <i>PC12 cells</i>               | Widely used for pharmacological studies.<br>Easy to maintain in culture.<br>Well established proliferation conditions and differentiation protocols [110].<br>Sensitive to toxins that disrupt mitochondrial function, including MPP <sup>+</sup> , 6-OHDA and paraquat [92].                     | Rat origin.<br>Derived from an adrenal pheochromocytoma, which may show distinct signalling pathways than those seen in neuronal cells [186].                                         |
| <i>LUHMES cells</i>             | Human origin.<br>Exhibit dopaminergic features following differentiation [118].                                                                                                                                                                                                                   | Hard to transfect [92].                                                                                                                                                               |
| <i>HEK293 cells</i>             | Human origin.<br>High transfection efficiency.<br>Easy to maintain in culture.<br>Suitable for high throughput experiments [187].                                                                                                                                                                 | Non-neuronal model.<br>Genetic and epigenetic instability at higher passages [188].                                                                                                   |
| <i>NSC-34 cells</i>             | Present high degree of morphological and physiological properties of motor neurons.<br>Easy to maintain in culture.<br>Capability of being differentiated using different approaches.<br>Suitable for high throughput screenings.<br>May be sensitized to ferroptosis upon differentiation [128]. | Mouse origin.<br>Need differentiation to solve the lack of glutamate toxicity [189].                                                                                                  |
| <i>Organoids</i>                | More representative of the <i>in vivo</i> 3D brain environment.<br>Show improved cellular maturity.<br>High potential for CNS drug screening [92].                                                                                                                                                | Low reproducibility.<br>Require improved differentiation protocols and the establishment of an efficient vascularization.<br>Ethical concerns [92].                                   |
| <i>iPSCs</i>                    | Self-renewal potential.<br>Potential to be differentiated into any cell type.<br>Suitable for high throughput experiments<br>Enable the <i>in vitro</i> mimicry of the disease microenvironment.<br>Capability of being differentiated into dopaminergic neurons [190,191].                       | Difficult to establish the cellular outcome more representative of the disease pathogenesis.<br>Require quality controls and the use of standardized protocols.<br>Costly model [92]. |
| <i>Primary neuronal culture</i> | Morphologically and physiologically comparable to human dopaminergic neurons                                                                                                                                                                                                                      | Cellular outcome might depend on the differentiation protocol.                                                                                                                        |

|                           |                  |                                                                                                                                                                      |                                                                                                                 |
|---------------------------|------------------|----------------------------------------------------------------------------------------------------------------------------------------------------------------------|-----------------------------------------------------------------------------------------------------------------|
|                           |                  | High potential for generating novel genetic models.                                                                                                                  | Low transfection efficiency and difficult to maintain in culture [92,186].<br>Ethical concerns.                 |
| <b>Glial cell culture</b> | Astrocytes       | Suitable for repeated passages and amenable for cryopreservation.                                                                                                    | Its growth is relatively slow, which makes it difficult to obtain [141].                                        |
|                           | Microglia        | Suitable for high throughput experiments. Can be differentiated and produce myelin in the absence of signals from axons.                                             | Limited to the study of chronic diseases in animals and older humans.                                           |
|                           | Oligodendrocytes | Easy to isolate and maintain.                                                                                                                                        | Must be isolated from brain biopsies (in case of human oligodendrocytes), which leads to ethical problems [92]. |
| <b>Brain slices</b>       |                  | Allows experimental manipulations that are complicate to perform <i>in vivo</i> . In the scope of MS can be demyelinated <i>in vitro</i> by exposure to toxins [92]. | Several compounds that seem to be good candidates in this model, failed in human clinical trials.               |

6-OHDA: 6-hydroxydopamine; CNS: Central nervous system; iPSCs: Induced pluripotent stem cell lines; MPP<sup>+</sup>: 1-Methyl-4-phenylpyridinium; MS: Multiple sclerosis.

**Table S2.** Advantages and disadvantages of *in vivo* models used in the study of neurodegenerative diseases.

| Model                                         | Advantages                                                                                                                                                                                                                                                                                                                                                                                                                                                        | Disadvantages                                                                                                                                                                          |
|-----------------------------------------------|-------------------------------------------------------------------------------------------------------------------------------------------------------------------------------------------------------------------------------------------------------------------------------------------------------------------------------------------------------------------------------------------------------------------------------------------------------------------|----------------------------------------------------------------------------------------------------------------------------------------------------------------------------------------|
| <b>Rodents</b>                                | Mimic the pathology.<br>Possibility to create simulations of the pathology.<br>Express orthologues of human proteins.<br>Well established protocols.                                                                                                                                                                                                                                                                                                              | Ethical concerns.<br>Human and rodent brain with particular differences in what concerns to development and function [168].                                                            |
| <b>Drosophila melanogaster</b>                | 70% of genetic conservation for human disease-related genes [192].<br>Availability of numerous and well-established agents capable of inducing disease phenotypes (4-Vinylcyclohexene, Bisphenol A, among others) [193,194].<br>Easy access of compounds to the brain[192].                                                                                                                                                                                       |                                                                                                                                                                                        |
| <b>Caenorhabditis elegans</b>                 | Transparent body and precise neuronal anatomy [166].<br>Short lifespan (3 weeks) [166].<br>Fully sequenced and well-annotated genome, with ~38 % of the genes having human orthologues [198].                                                                                                                                                                                                                                                                     | Highly divergent from human physiology [195–197].                                                                                                                                      |
| <b>Zebra fish</b>                             | Display easily quantifiable behaviours.<br>Simple, but well-conserved nervous system.<br>Present a fully characterized genome, whose nucleotide sequence is comparable to other animal models [199,200].<br>95% of genetic homology to humans, fast development and easy to breed [201].<br>Functional blood-brain barrier that is established 3 days after fertilization [202].<br>84% of genetic conservation for human genes associated to dementia [203,204]. |                                                                                                                                                                                        |
| <b>Other animal models (dog, rabbit, pig)</b> | Available for genetic modification to modeling ND.<br>More similar with human organ physiology and anatomical dimensions [180].                                                                                                                                                                                                                                                                                                                                   | Low efficiency of homologous recombination.<br>Long-life cycle.<br>Lack of embryonic stem cells for <i>in vitro</i> genome editing [181].<br>Ethical concerns [205].<br>Costly models. |
